# Divergence between LDL Oxidative Susceptibility and Urinary F<sub>2</sub>-Isoprostanes as Measures of Oxidative Stress in Type 2 Diabetes

SRIDEVI DEVARAJ,<sup>1</sup> SHAINA V. HIRANY,<sup>1</sup> RAYMOND F. BURK,<sup>2</sup> and ISHWARLAL JIALAL<sup>1\*</sup>

**Background:** Oxidative stress is pivotal in atherogenesis. Although the most widely used indirect assay to quantify oxidative stress is LDL oxidative susceptibility, direct assays such as urinary F<sub>2</sub>-isoprostanes have shown great promise.

**Methods:** We evaluated the utility of both a direct measure of oxidative stress (urinary F<sub>2</sub>-isoprostanes) and an indirect measure of copper-catalyzed, LDL oxidation in a model of increased oxidative stress (diabetes). We also evaluated an enzyme immunoassay (EIA) method for urinary F<sub>2</sub>-isoprostanes with a gas chromatography–mass spectrometry method.

**Results:** Excellent intraassay and interassay CVs of <4% were obtained with our EIA method. A good correlation was obtained between the two methods ( $r = 0.80$ ;  $n = 68$ ) of F<sub>2</sub>-isoprostane measurement. An excellent correlation for F<sub>2</sub>-isoprostane concentrations was obtained between a timed collection vs 24-h urine ( $r = 0.96$ ;  $n = 46$ ). Baseline F<sub>2</sub>-isoprostane concentrations by EIA were significantly higher in both type 2 diabetics with and without macrovascular complications compared with controls ( $P < 0.001$ ). Supplementation with  $\alpha$ -tocopherol led to a significant reduction in F<sub>2</sub>-isoprostane concentrations in all diabetic patients compared with baseline values ( $2.51 \pm 1.76$  compared with  $1.69 \pm 1.32$  ng/mg creatinine;  $P < 0.001$ ). There were no significant differences in LDL oxidation in both diabetic groups compared with controls.  $\alpha$ -Tocopherol supplementation led to significant increases in the lag phase of oxidation as measured by 3 indices in all groups.

**Conclusions:** The measurement of urinary F<sub>2</sub>-isoprostanes provides a direct measure of in vivo lipid peroxidation and oxidative stress and appears to be superior to an indirect measure, e.g., LDL oxidative susceptibility, in type 2 diabetes.

© 2001 American Association for Clinical Chemistry

Atherosclerotic vascular disease is the major cause of mortality and morbidity in the US. Data continue to accrue supporting the hypothesis that oxidative stress is pivotal in the genesis of the atherosclerotic lesion (1, 2). There are several direct as well as indirect measures for assaying oxidative stress. Although the most widely used indirect method for measuring oxidative stress is the measurement of LDL oxidative susceptibility (3), direct assays such as measurement of urinary F<sub>2</sub>-isoprostanes have shown great promise.

Much evidence implicates oxidative modification of LDL in the pathogenesis of atherosclerosis (4, 5). The diabetic state confers an increased propensity to accelerated atherosclerosis. Factors that may contribute to increased oxidative stress in diabetic patients include antioxidant deficiencies (decreased ascorbate, glutathione, and superoxide dismutase), protein glycation (glucooxidation), and increased production of reactive oxygen species (superoxide, hydrogen peroxide) (6, 7). Other evidence for increased oxidative stress in diabetes includes increased oxidative DNA damage as well as increased titers of autoantibodies to oxidized LDL (8–10). However, data on the oxidizability of LDL in diabetic patients are conflicting (8, 11–14).

Recently, the discovery of F<sub>2</sub>-isoprostanes, which are prostaglandin-like compounds produced in vivo by free radical peroxidation of arachidonic acid, has allowed for the direct assessment of in vivo lipid peroxidation in plasma (15–17). Thus, quantification of F<sub>2</sub>-isoprostanes may provide a reliable direct measure of oxidative stress in vivo. Increased concentrations of F<sub>2</sub>-isoprostanes have been reported in type 2 diabetic patients (18, 19), further underscoring the increased oxidative stress present the

<sup>1</sup> Division of Clinical Biochemistry and Human Metabolism and the Center for Human Nutrition, Department of Pathology and Internal Medicine, University of Texas Southwestern Medical Center, Dallas, TX 75390-9073.

<sup>2</sup> Clinical Nutrition Research Unit, Vanderbilt University Medical Center, C-2104 MCN, Nashville, TN 37232-2279.

\*Address correspondence to this author at: Division of Clinical Biochemistry and Human Metabolism, University of Texas Southwestern Medical Center, 5323 Harry Hines Blvd., Dallas, TX 75390-9073. Fax 214-648-8037; e-mail jialal.i@pathology.swmed.edu.

Received June 20, 2001; accepted July 23, 2001.

diabetic state. The major drawback in measurement of  $F_2$ -isoprostanes is that the methodology involves gas chromatography-mass spectrometry (GC-MS),<sup>3</sup> which, although sensitive and accurate, is laborious and time-consuming and may not be available in many laboratories. This has prompted development of commercial immunoassay methods for the measurement of  $F_2$ -isoprostanes.

To date, no studies have compared a direct and indirect measure of increased oxidative stress; the present study was undertaken to evaluate the utility of these indices of oxidative stress, i.e.,  $F_2$ -isoprostanes and LDL oxidative susceptibility in a model of increased oxidative stress, type 2 diabetes. We also evaluated an enzyme immunoassay (EIA) method for measurement of urinary  $F_2$ -isoprostanes and validated it against the "gold standard" GC-MS method. Furthermore, we assessed the effect of  $\alpha$ -tocopherol supplementation on urinary  $F_2$ -isoprostanes in these diabetic patients.

### Materials and Methods

#### PATIENTS

This study was approved by the Institutional Review Board. Volunteers ( $n = 75$ ) were recruited after giving informed consent. They were divided into three groups: type 2 diabetic patients without macrovascular complications [(DM2);  $n = 25$ ]; type 2 diabetic patients with macrovascular complications (DM2-MV;  $n = 25$ ); and age- and sex-matched healthy controls ( $n = 25$ ). Selection criteria for the participants have been described previously (20). All volunteers gave informed consent. Fasting blood was obtained from all the participants at baseline and after 3 months of supplementation with all-*rac*  $\alpha$ -tocopherol (1200 IU/day) and after a 2-month washout phase. Urine samples collected after 24 h were stored at  $-70^\circ\text{C}$  for  $F_2$ -isoprostane analysis by EIA and GC-MS. Plasma samples were stored at  $-70^\circ\text{C}$  and analyzed for  $\alpha$ -tocopherol by HPLC and for LDL oxidation as described previously (20).

For comparison of  $F_2$ -isoprostane concentrations in timed vs 24-h urine collection, 46 volunteers were requested to collect a first morning urine sample and a 24-h collection sample on different days. Samples were frozen at  $-70^\circ\text{C}$  until analysis of  $F_2$ -isoprostane concentrations by EIA.

#### LDL ISOLATION AND OXIDATION

Fasting blood (60 mL) anticoagulated with EDTA was obtained for studies of LDL oxidation. LDL (density, 1.019–1.063 kg/L) was isolated by preparative ultracentrifugation from plasma collected in EDTA (1 g/L) as

described previously (21). After dialysis against 150 mmol/L NaCl and 1 mmol/L EDTA (pH 7.4), LDL was filtered and protein content was measured as described previously (21). After overnight dialysis against phosphate-buffered saline, pH 7.4, LDL (100 ng/L protein) was oxidized with 5  $\mu\text{mol/L}$  copper at  $37^\circ\text{C}$  for 8 h. The time points were 0, 0.5, 1, 1.5, 2, 2.5, 3, 4, 5, and 8 h, respectively. At the respective time points, LDL oxidation was arrested with 200  $\mu\text{mol/L}$  EDTA and 40  $\mu\text{mol/L}$  butylated hydroxytoluene followed by refrigeration. We used three assays to quantify LDL oxidation to better appreciate lipid peroxidation and aldehydic modification of apolipoprotein B-100 (apo B-100) (4, 22). We determined the amount of conjugated dienes formed by monitoring the absorbance of the LDL sample at 234 nm at various time points using a phosphate-buffered saline blank (21). We measured the lipid peroxide content of LDL by the ferrous oxide-xylene orange method (23), and we measured apo B fluorescence of LDL samples after dilution in a spectrofluorometer with excitation set at 360 nm and emission at 430 nm using a 5-nm slit width (21). We computed the lag phase of oxidation using the time course curve (21) from the three indices of oxidation.

#### EIA ANALYSIS OF $F_2$ -ISOPROSTANES

Purification and extraction of urine samples was performed before EIA analysis as reported previously (24). The pH of the urine samples was adjusted to  $<4.0$  with 1.0 mol/L HCl, and a 1-mL aliquot of urine was extracted on a Bakerbond SPE C18 column (JT Baker) that had previously been rinsed with 5 mL of methanol followed by 5 mL of ultrapure water (Cayman Chemical; catalog no. 400000). The columns were then washed with ultrapure water, allowed to dry, and then equilibrated with 5 mL of hexane. After eluting with ethyl acetate and 10 mL of methanol, sodium acetate was added to the eluate, which was then vortex-mixed and subjected to silica gel chromatography. Elution was carried out with ethyl acetate and methanol (1:1 by volume); eluates were then dried under nitrogen and reconstituted with EIA buffer (1 mL). The extracted samples were diluted 1:5 to 1:8 with EIA buffer and assayed according to manufacturer's protocol for the 8-Isoprostane Enzyme Immunoassay method (Cayman Chemical). The EIA exhibits  $>1\%$  cross-reactivity with 8-isoprostaglandin  $F_3\alpha$  (21%), 8-isoprostaglandin  $E_2$  (1.8%), 2,3-dinor 8-isoprostaglandin  $F_2\alpha$  (1.7%), and 8-isoprostaglandin  $E_1$  (1.6%). We measured urine creatinine on the Olympus (Redondo, CA) by the Jaffe reaction using standard techniques.  $F_2$ -Isoprostane concentrations are expressed as ng/mg of creatinine.

#### GC-MS ANALYSIS OF $F_2$ -ISOPROSTANE

We measured  $F_2$ -isoprostanes in urine on frozen samples after thin-layer chromatographic purification by GC negative-ion chemical ionization and electron-ionization MS using a deuterated internal standard in the laboratory of Dr. Raymond F. Burk (Vanderbilt University, Nashville,

<sup>3</sup>Nonstandard abbreviations: GC-MS, gas chromatography-mass spectrometry; EIA, enzyme immunoassay; DM2, type 2 diabetic patients without macrovascular complications; DM2-MV, type 2 diabetic patients with macrovascular complications; and apo, apolipoprotein.

TN) (25). Catalytic hydrogenation and formation and analyses of boronate derivatives were carried out as described previously (25).

#### STATISTICS

Linear regression analysis was performed using the Microsoft Excel software. Comparison of differences between groups was determined by Wilcoxon signed-rank test with the use of Sigma Stat software. The degree of significance was set at  $<0.05$ .

### Results

#### PRECISION

Intraassay ( $n = 5$ ) and interassay ( $n = 5$ ) CVs of  $<4\%$  for three concentrations of  $F_2$ -isoprostanes were obtained for the EIA method. The precision and accuracy for the GC-MS method were  $\pm 6\%$  and  $96\%$ , respectively (25). The lowest limits of detection with the EIA and GC-MS methods were 4 ng/L and 5 ng/L, respectively.

#### VALIDATION OF EIA VS GC-MS

The EIA assay was validated for  $F_2$ -isoprostanes determination in urine by comparison with the GC-MS method. A good correlation was obtained between the two methods ( $r = 0.80$ ;  $n = 68$ ; Fig. 1). The median  $F_2$ -isoprostane concentrations for the EIA and GC-MS methods were 1.74 and 1.70 ng/mg of creatinine, respectively.

#### COMPARISON OF TIMED VS 24-H URINE COLLECTION

We assessed the variation in  $F_2$ -isoprostane excretion between the first morning urine collection and 24-h urine collection in 46 volunteers.  $F_2$ -Isoprostane concentrations were 0.41–10.6 ng/mg of creatinine. An excellent correlation for  $F_2$ -isoprostane concentrations was obtained between the two collection methods ( $r = 0.96$ ;  $n = 46$ , Fig. 2). The mean  $F_2$ -isoprostane concentrations in timed vs 24-h

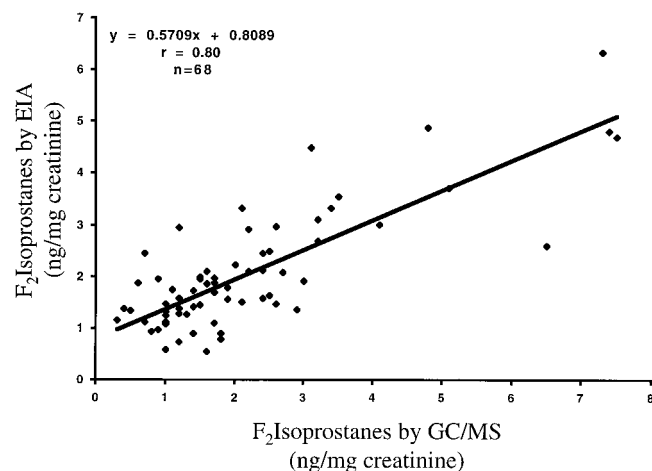

Fig. 1. Validation of enzyme immunoassay for  $F_2$ -isoprostanes with GC-MS.

$F_2$ -Isoprostane concentrations were analyzed in urine samples ( $n = 68$ ) by both the EIA method and by the GC-MS as described in *Materials and Methods*.

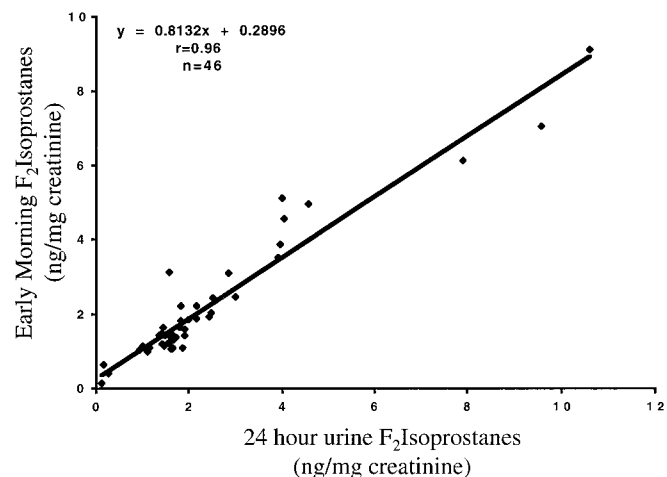

Fig. 2. Comparison of early morning vs 24-h urine for measurement of isoprostanes.

Volunteers ( $n = 46$ ) were asked to collect an early morning urine sample as well as a 24-h urine collection on different days. Samples were frozen at  $-70^\circ\text{C}$ , and  $F_2$ -isoprostanes were analyzed in both samples by EIA as described in *Materials and Methods*.

collection were  $2.26 \pm 1.79$  and  $2.38 \pm 2.11$  ng/mg of creatinine, respectively.

#### $F_2$ -ISOPROSTANE CONCENTRATIONS IN DIABETIC PATIENTS

$F_2$ -Isoprostane concentrations by EIA were significantly higher in DM2 and DM2-MV patients compared with age- and sex-matched controls ( $2.03 \pm 1.17$  and  $2.61 \pm 1.53$  ng/mg creatinine, respectively, compared with  $0.71 \pm 0.35$  ng/mg creatinine;  $P < 0.001$ , Fig. 3); however, no significant differences existed at baseline between DM2 and DM2-MV for  $F_2$ -isoprostane concentrations ( $P = 0.37$ ). We examined the effect of  $\alpha$ -tocopherol supplementation (1200 IU/day) on urinary excretion of  $F_2$ -isoprostane in diabetic patients with and without macrovascular complications, using the EIA and GC-MS methods.

$\alpha$ -Tocopherol supplementation was associated with an increase in plasma  $\alpha$ -tocopherol concentrations as re-

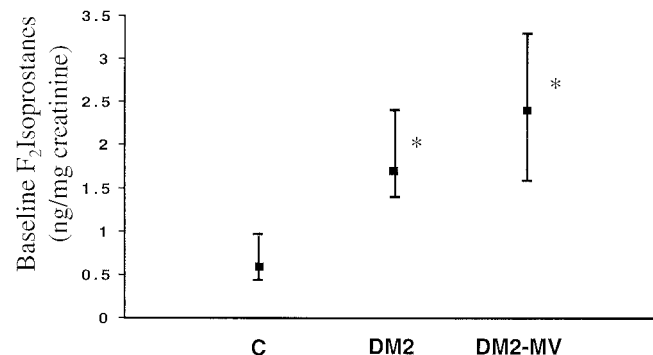

Fig. 3.  $F_2$ -Isoprostane concentrations in type 2 diabetic patients.

Twenty-four-hour urine samples were obtained from controls and DM2-MV and DM2 patients and stored at  $-70^\circ\text{C}$ . Data represent 25th percentile, median, and 75th percentile of  $F_2$ -isoprostane concentrations by EIA in the three groups. \*,  $P < 0.001$  by Wilcoxon signed-rank test.

**Table 1. Effect of  $\alpha$ -tocopherol on F<sub>2</sub>-isoprostane concentrations in diabetic patients.<sup>a</sup>**

|                            | GC-MS                          |                              | EIA                            |                                |
|----------------------------|--------------------------------|------------------------------|--------------------------------|--------------------------------|
|                            | DM2                            | DM2-MV                       | DM2                            | DM2-MV                         |
| Baseline                   | 1.7<br>(1.5, 2.6)              | 2.5<br>(1.7, 3.2)            | 1.7<br>(1.4, 2.4)              | 2.4<br>(1.6, 3.3)              |
| $\alpha$ -Tocopherol phase | 1.4<br>(1.2, 1.6)              | 1.4 <sup>b</sup><br>(1, 2.1) | 1.4<br>(1.1, 1.6)              | 1.5 <sup>b</sup><br>(1, 1.7)   |
| Washout phase              | 1.9 <sup>c</sup><br>(1.6, 2.4) | 2.6 <sup>c</sup><br>(1, 3.1) | 2.0 <sup>c</sup><br>(1.5, 2.3) | 2.6 <sup>c</sup><br>(1.3, 2.9) |

<sup>a</sup> Data are presented as median (25th and 75th percentiles).<sup>b</sup>  $P < 0.001$  compared with baseline by Wilcoxon signed-rank test.<sup>c</sup>  $P > 0.6$  compared with baseline by Wilcoxon signed-rank test.

ported previously (20). Supplementation with  $\alpha$ -tocopherol led to a significant reduction in F<sub>2</sub>-isoprostane concentrations in the combined diabetic group compared with baseline values ( $2.51 \pm 1.76$  ng/mg of creatinine compared with  $1.69 \pm 1.32$  ng/mg of creatinine;  $P < 0.001$ ). However, when the diabetic patients were subgrouped into DM2 and DM2-MV, only the reduction in DM2-MV was significant after supplementation ( $P < 0.001$ ; Table 1) in both the EIA and GC-MS methods. In addition, F<sub>2</sub>-isoprostane concentrations returned to baseline values after the 6-week washout phase in all groups ( $P > 0.6$ ).

#### LDL OXIDATIVE SUSCEPTIBILITY IN DIABETIC PATIENTS

LDL oxidative susceptibility was monitored by three indices of oxidation: (a) conjugated dienes, (b) lipid peroxides, and (c) apo B fluorescence. We found no significant differences in lag phase, using all three indices of LDL oxidative susceptibility, in both diabetic groups compared with controls. Furthermore, there was no significant difference between the DM2 and DM2-MV groups (Table 2).  $\alpha$ -Tocopherol supplementation led to significant increases in lag phase of oxidation as measured by all three indices in the control, DM2, and DM2-MV groups, respectively, as reported previously for conjugated dienes (20).

#### Discussion

Cardiovascular disease is the major cause of mortality and morbidity in the US. Oxidative stress plays a crucial role in the genesis and progression of the atherosclerotic

lesion. There are several direct as well as indirect measures for assaying oxidative stress. Although the most widely used indirect method for measuring oxidative stress is measurement of LDL oxidative susceptibility, direct assays such as measurement of urinary F<sub>2</sub>-isoprostanes have shown great promise. In this report, we have validated an EIA method for quantification of urinary F<sub>2</sub>-isoprostanes, sensitive markers of in vivo oxidative stress, and compared the method with the gold standard GC-MS method. In addition, using a model of oxidative stress, type 2 diabetes, we highlighted the divergence between LDL oxidative susceptibility as assessed by three techniques and urinary F<sub>2</sub>-isoprostanes.

F<sub>2</sub>-Isoprostanes are prostaglandin-like compounds formed in vivo from free radical-catalyzed peroxidation of arachidonic acid, mainly via a noncyclooxygenase-dependent mechanism. F<sub>2</sub>-Isoprostanes are found in body tissues in the esterified form and in biologic fluids, such as plasma and urine, in the free form (15–17). The relevance of measurement of urinary F<sub>2</sub>-isoprostanes with regard to atherosclerosis has been brought forth in many studies (15–19). F<sub>2</sub>-Isoprostanes are increased after LDL oxidation by macrophages, endothelial cells, or copper. Increased concentrations have been detected in oxidized LDL and also in patients with established risk factors for premature atherosclerosis, such as diabetes, hypercholesterolemia, and smoking (15–19). F<sub>2</sub>-Isoprostanes have been found to localize in foam cells in human atherosclerotic lesions. Furthermore,  $\alpha$ -tocopherol supplementation has been found to suppress F<sub>2</sub>-isoprostanes and atherogenesis in apo-E-deficient mice. In humans,  $\alpha$ -tocopherol supplementation has been shown to lower urinary F<sub>2</sub>-isoprostanes in patients with hypercholesterolemia or diabetes (15–19). Also, in a recent report, we showed that  $\alpha$ -tocopherol supplementation (400 IU/day) can decrease urinary F<sub>2</sub>-isoprostanes in healthy volunteers (4), but this was not confirmed by another recent study (26), probably because of the study's small sample size ( $n = 5$ ).

F<sub>2</sub>-Isoprostanes can be measured accurately and sensitively by a solid-phase extraction procedure, followed by selective-ion monitoring GC-MS, using tritiated prostaglandin F<sub>2</sub>- $\alpha$  as internal standard (25). However, although GC-MS methods are the method of choice, they are technique dependent and involve sophisticated instrumentation that is not available in most laboratories. We have shown excellent intra- and interassay precision for the EIA method, as is seen for the GC-MS method. We also demonstrate an excellent correlation with the GC-MS method, and we show that the EIA method can measure accurately on a timed vs 24-h specimen. We show substantial increases in a model of oxidative stress, type 2 diabetes, using this assay and also show that it can be modulated with antioxidant therapy. Proudfoot et al. (27) previously compared the measurement of F<sub>2</sub>-isoprostanes in urine by EIA and GC-MS and showed a poor correlation; however, only 14 samples were assayed from healthy volunteers, and it is not clear whether both

**Table 2. LDL oxidative susceptibility in type 2 diabetic patients and matched controls.<sup>a</sup>**

|                                   | Controls        | DM2             | DM2-MV          |
|-----------------------------------|-----------------|-----------------|-----------------|
| Conjugated dienes lag phase, min  | 65.6 $\pm$ 11.6 | 58.6 $\pm$ 11.2 | 56.9 $\pm$ 14.9 |
| Lipid peroxides lag phase, min    | 66.2 $\pm$ 8.4  | 64.5 $\pm$ 11.0 | 63.8 $\pm$ 13.9 |
| apo B fluorescence lag phase, min | 38.1 $\pm$ 18.2 | 30.1 $\pm$ 16.2 | 29.1 $\pm$ 19.2 |

<sup>a</sup> Data are expressed as mean  $\pm$  SD.



methods were conducted at the same time. Wang et al. (28), however, measured F<sub>2</sub>-isoprostanes by both GC-MS and EIA in 9 healthy volunteers and showed a good correlation between the two methods ( $r = 0.99$ ). Thus, the measurement of F<sub>2</sub>-isoprostanes by EIA may provide a sensitive, specific, and noninvasive method for the assessment of in vivo lipid peroxidation in humans, a method that is simpler and less expensive. Furthermore, large numbers of samples can be quantified at the same time with this method. Whereas the measurement of urinary F<sub>2</sub>-isoprostanes is a direct measure of oxidative stress, LDL oxidative susceptibility is an indirect measure of oxidative stress. LDL is isolated from plasma and then subjected to oxidative stress, whereas F<sub>2</sub>-isoprostanes are directly measured in urine (29). Furthermore, in disease states, the patients are on drugs that could potentially partition in LDL and alter its oxidative susceptibility. Thus, isoprostanes appear to be superior in this case. Also, it is possible that we may have seen significant differences in LDL oxidizability with larger sample sizes. Because urinary F<sub>2</sub>-isoprostanes could also derive from local production in the kidney, caution should be exercised in using this as a measure of oxidative stress in patients with chronic renal failure (25). It should also be pointed out that the EIA, although largely specific for 8-isoprostane, also exhibits cross-reactivity with certain other prostaglandins. Furthermore, as pointed out by Lawson et al. (30), all of the 64 possible isomers of F<sub>2</sub>-isoprostanes share the same ring structure, and it is believed that prostaglandin antigenicity is largely directed toward the ring. Thus, it is possible that the antibody in this EIA also recognizes other isoprostanes, accounting for the similar concentrations obtained with GC-MS.

Although the diabetic state has been shown to have increased oxidant stress, as evidenced by increased concentrations of superoxide release and antioxidant deficiencies as well as increased F<sub>2</sub>-isoprostane concentrations by GC-MS, there is conflict in the literature with regard to in vitro susceptibility of LDL to oxidation, as assessed by the lag phase in type 2 diabetic patients (8, 11–13, 20, 31). In our study, LDL oxidative susceptibility, as measured by lag phase using three indices, conjugated dienes, lipid peroxides, and apo B fluorescence, was not significantly increased in type 2 diabetic patients (20). In this report, we also show that  $\alpha$ -tocopherol supplementation leads to a decrease in LDL oxidative susceptibility (20). This finding confirms the reports of previous investigators (32, 33).

Thus, measurement of urinary F<sub>2</sub>-isoprostanes provides direct measure of lipid peroxidation and whole body oxidative stress and appears to be superior to indirect measures, such as LDL oxidative susceptibility, in certain conditions of increased oxidative stress, such as type 2 diabetes.

This work was supported by grants from the National Institutes of Health (1 RO1 AT00005, K24 AT 00596, DK

26657) and the American Diabetes Association. We thank Amy Motley for assistance with the GC-MS assays.

## References

1. Kunsch C, Medford RM. Oxidative stress as a regulator of gene expression in the vasculature. *Circ Res* 1999;85:753–66.
2. Witztum JL, Berliner JA. Oxidized phospholipids and isoprostanes in atherosclerosis. *Curr Opin Lipidol* 1998;9:441–8.
3. Jialal I, Devaraj S. Low density lipoprotein oxidation, antioxidants and atherosclerosis: a clinical biochemistry perspective. *Clin Chem* 1996;42:498–506.
4. Devaraj S, Jialal I. Oxidized low density lipoprotein and atherosclerosis. *Int J Clin Lab Res* 1996;26:178–84.
5. Berliner JA, Heinecke JW. The role of oxidized lipoproteins in atherogenesis. *Free Radic Biol Med*, 1992;92:127–43.
6. Bierman E. Atherogenesis in diabetes. *Arterioscler Thromb* 1992; 12:647–56.
7. Banga JD, Sixma JJ. Diabetes mellitus, vascular disease and thrombosis. *Clin Hematol* 1986;15:465–92.
8. Babiy A, Gebicki J, Sullivan DR, Willey K. Increased oxidizability of plasma lipoproteins in diabetic patients can be decreased by probucol therapy and is not due to glycation. *Biochem Pharmacol* 1992;43:995–1000.
9. Dandona P, Thusu K, Cook S, Snyder B, Makowski J, Armstrong D, Nicotera T. Oxidative damage to DNA in diabetes mellitus. *Lancet* 1996;347:444–5.
10. Bellomo G, Maggi E, Poli M, Agosta FG, Bollati P, Finardi G. Autoantibodies against Ox-LDL in NIDDM. *Diabetes* 1995;44: 60–6.
11. Yoshida H, Ishikawa T, Nakamura H. Vitamin E/Lipid peroxide ratio and susceptibility of LDL to oxidative modification in NIDDM. *Arterioscler Thromb Vasc Biol*, 1997;17:1438–46.
12. Beaudoux JL, Guillausseau PJ, Peynet J, Flourie F, Assayag M, Tielmans D, et al. Enhanced susceptibility of LDL to in vitro oxidation in type 1 and 2 diabetic patients. *Clin Chim Acta* 1995;239:131–41.
13. Cominacini L, Garbin U, Pastorino AM, Fratta Pasini A, Campagnola M, De Santis A, et al. Increased susceptibility of LDL to in vitro oxidation in patients with IDDM and NIDDM. *Diabetes Res* 1994;26:173–84.
14. Mironova MA, Klein RL, Virella GT, Lopes-Virella MF. Anti-modified LDL antibodies, LDL-containing immune complexes, and susceptibility of LDL to in vitro oxidation in patients with type 2 diabetes. *Diabetes* 2000;49:1033–41.
15. Pratico D. F<sub>2</sub>-Isoprostanes: sensitive and specific non-invasive indices of lipid peroxidation in vivo. *Atherosclerosis* 1999;147:1–10.
16. Roberts LJ II, Morrow J. The generation and actions of isoprostanes. *Biochim Biophys Acta* 1997;1345:121–35.
17. Patrono C, Fitzgerald G. Isoprostanes—potential markers of oxidant stress in atherothrombotic disease. *Arterioscler Thromb Vasc Biol* 1997;17:2309–15.
18. Davi G, Ciabattini G, Consoli A, Mezzetti A, Falco A, Santarone G, et al. In-vivo formation of 8-epi PGF<sub>2</sub> $\alpha$  and platelet activation in diabetes mellitus-effect of improved metabolic control and vitamin E supplementation. *Circulation* 1999;99:224–9.
19. Gopaul NK, Anggard EE, Mallet AI, Betteridge DJ, Wolff SP, Nourooz-zadeh J. Plasma 8-epi PGF<sub>2</sub> $\alpha$  levels are increased in individuals with NIDDM. *FEBS Lett* 1995;368:225–9.
20. Devaraj S, Jialal I. LDL. Post-secretory modification, monocyte function and circulating adhesion molecules in type 2 diabetic patients with and without macrovascular complications: the effect of  $\alpha$  tocopherol supplementation. *Circulation* 2000;102:191–6.
21. Jialal I, Fuller CJ, Huet BA. The effect of  $\alpha$ -tocopherol supplement-

- tation on LDL oxidation: a dose-response study. *Arterioscler Thromb Vasc Biol* 1995;15:90–7.
22. Devaraj S, Jialal I. Assessment of lipoprotein peroxidation. In: Rifai N, Warnick GR, Dominiczak MH, eds. *Handbook of lipoprotein testing*. Washington: AACC Press, 2001:465–79.
23. Marangon K, Devaraj S, Jialal I. Measurement of protein carbonyls by a sensitive ELISA. *Clin Chem* 1999;45:577–8.
24. Marangon K, Devaraj S, Tirosh O, Packer L, Jialal I. Comparison of the effect of  $\alpha$ -lipoic acid and  $\alpha$ -tocopherol supplementation on measures of oxidative stress. *Free Radic Biol Med* 1999;27:1114–21.
25. Morrow JD, Jackson Roberts L. Mass spectrometric quantitation of  $F_2$ -isoprostanes in biological fluids and tissues as a measure of oxidant stress. *Methods Enzymol* 1998;300:3–12.
26. Meagher EA, Barry OP, Lawson JA, Rokach J, Fitzgerald GA. Effects of vitamin E on lipid peroxidation in healthy persons. *JAMA* 2001;285:1178–82.
27. Proudfoot J, Barden A, Mori TA, Burke V, Croft KD, Beilin LJ, Puddey IB. Measurement of urinary  $F_2$ -isoprostanes as markers of in vivo lipid peroxidation—a comparison of EIA with GC/MS. *Anal Biochem* 1999;272:209–15.
28. Wang Z, Ciabattoni G, Creminon C, Lawson J, Fitzgerald GA, Patrono C, Macclouf J. Immunological characterization of urinary 8-epi  $PGF_2\alpha$  excretion in man. *J Pharmacol Exp Ther* 1995;275:94–100.
29. Jialal I. Evolving lipoprotein risk factors: lipoprotein 9a and oxidized LDL. *Clin Chem* 1998;44:1827–32.
30. Lawson JA, Rokach J, Fitzgerald GA. Isoprostanes: formation, analysis and use as indices of lipid peroxidation in vivo. *J Biol Chem* 1999;274:24441–4.
31. Oranje WA, Wolffenbuttel HR. Lipid peroxidation and atherosclerosis in type 2 diabetes. *J Lab Clin Med* 1999;134:19–32.
32. Reaven PD, Herold DA, Barnett J, Edelman S. Effects of vitamin E on susceptibility of LDL and LDL subfractions to oxidation and on protein glycation in NIDDM. *Diabetes Care* 1995;18:807–16.
33. Fuller CJ, Chandalia M, Garg A, Grundy SM, Jialal I. RRR-AT supplementation at pharmacological doses decreases LDL oxidative susceptibility but not protein glycation in patients with diabetes mellitus. *Am J Clin Nutr* 1996;63:753–9.
